# Supplementary material for: The Influence of Maternal and Household Resources, and Parental Psychosocial Child Stimulation on Early Childhood Development: A Cross-Sectional Study of Children 36–59 Months in Honduras
Source: MDPI journal article supplement (doi:10.3390/ijerph15050926), 2018-05-07
Supplement: s1 [file s1]

# The Influence of Maternal and Household Resources, and Parental Psychosocial Child Stimulation on Early Childhood Development: A Cross-Sectional Study of Children 36–59 Months in Honduras

Helga Bjørnøy Urke, Mariela Contreras and Dennis Juma Matanda

## Supplemental Material

**Table S1.** Early Childhood Development Index \*.

| Domain                 | Questions                                                                                       | Coding (no/yes) |
|------------------------|-------------------------------------------------------------------------------------------------|-----------------|
| Language/Cognitive     | Can your child identify or name at least 10 letters of the alphabet?                            |                 |
|                        | Can your child read at least 4 simple, popular words?                                           |                 |
|                        | Does your child know the name and recognize the symbol of all numbers from 1 to 10?             |                 |
| Physical               | Can your child pick up a small object with two fingers, like a stick or a rock from the ground? |                 |
|                        | Is your child sometimes too sick to play?                                                       | Reverse coded   |
| Socio-emotional        | Does your child get along well with other children?                                             |                 |
|                        | Does your child kick, bite, or hit other children or adults?                                    | Reverse coded   |
|                        | Does your child get easily distracted?                                                          | Reverse coded   |
| Approaches to learning | Does your child follow simple directions on how to do something?                                |                 |
|                        | When given something to do, is your child able to do it independently?                          |                 |

\* Loizillon, A.; Petrowski, N.; Britto, P.; Cappa, C. *Development of the Early Childhood Development Index in MICS Surveys*; UNICEF: New York, NY, USA, 2017.
